# Supplementary material for: Genome-Wide Identification of PYL/RCAR ABA Receptors and Functional Analysis of LbPYL10 in Heat Tolerance in Goji (Lycium barbarum)
Source: Plants (Basel). 2024 Mar 20;13(6):887. doi: 10.3390/plants13060887 (PMC10975129; doi:10.3390/plants13060887)
Supplement: Supplementary file 1 [file plants-13-00887-s001.zip]

Archive with 9 entries (9 files):
- Figure S1. Chromosomal distribution of LbPYLs genes..jpg
- Figure S2.Analysis of Silent Regions in LbPYL10.jpg
- Figure S3. Phylogenetic tree of  genes related to chlorophyll degradation.jpg
- Figure S4.Conserved domain.pdf
- Figure S5.Conserved motifs.pdf
- Table S1. The primer sequences in qRT-PCR..xlsx
- Table S2. PYL genes in five species examined..xlsx
- Table S3. The sequences of motifs and cis-acting elements.xlsx
- Table S4. The sequences of cis-acting element.xlsx
