# Supplementary material for: Genome-Wide Identification of PYL/RCAR ABA Receptors and Functional Analysis of LbPYL10 in Heat Tolerance in Goji (Lycium barbarum)
Source: Plants (Basel). 2024 Mar 20;13(6):887. doi: 10.3390/plants13060887 (PMC10975129; doi:10.3390/plants13060887)
Supplement: Supplementary file 1 [file plants-13-00887-s001.zip › Table S1. The primer sequences in qRT-PCR..xlsx]

## Sheet: Table S1
Table S1. The primer sequences in qRT-PCR.
Gene symbol	Forward primers	Reverse primers
ACTIN1	CTCAGCACCTTCCAGCAGAT	TAACACTGCAACCGCATTTC
LbPYL1	GTCCGACGCTTTGACAACC	TCCTGACACAACCGACACTT
LbPYL2	GCGGAGTTGGGAGCATAAGA	ACCACCAACAACTCGAAAGC
LbPYL3	TGAGAGACACGTCATCAGCT	CGATTCCACCATCACCGTTC
LbPYL4	CCCGCAAACCTACAAACAGT	TCACCTCCATCCTCCTCCA
LbPYL5	TTCCTCAAGAGCTGCCATGT	GAACGCCACCAACAACACTA
LbPYL6	CAAACCATTCGTGAGCAGGT	TACGCCAAAGATGTGCTCCT
LbPYL7	ACACCAAAGACGAGACCTGT	ATGGGTTCTGTCCTGTCCTG
LbPYL8	GGTGTAAAGATTGTGGGCGG	CGACTACCATTGTTCCAGGC
LbPYL9	GAGCACATCCTTGGCATCAG	ACTCAATCACCAGTGTCCCT
LbPYL10	TTCCTCAAGAGCTGCCACAT	CGACACTGAAGCTGATGACG
LbPYL11	CGCACAAGTACCAGATTCCG	TGCTTGTGGGTTGTCGAAAC
LbPYL12	AATTCGACAAGCCACAACGC	TGATCCGCATCAACAACACT
LbPAO	GGCAAGAACACTGGACCTCA	ACGATCAGCTTGAGTGGGTG
LbSGRL	CTGTTGTGTGAGTGGACCGA	ATCCCCATAGAGCACAGCCT
pTRV2	TGTTACTCAAGGAAGCACGATGAGCT	CTTAGCCGCGAGGCTTTTTC
