# Supplementary material for: Genome-Wide Identification of PYL/RCAR ABA Receptors and Functional Analysis of LbPYL10 in Heat Tolerance in Goji (Lycium barbarum)
Source: Plants (Basel). 2024 Mar 20;13(6):887. doi: 10.3390/plants13060887 (PMC10975129; doi:10.3390/plants13060887)
Supplement: Supplementary file 1 [file plants-13-00887-s001.zip › Table S2. PYL genes in five species examined..xlsx]

## Sheet: Sheet1
Supplementary Table S2. PYL genes in five species examined
Species	Gene name	Gene ID
Arabidopsis_thaliana	AtPYL1	AT5G46790
	AtPYL10	AT4G27920
	AtPYL11	AT5G45860
	AtPYL12	AT5G45870
	AtPYL13	AT4G18620
	AtPYL2	AT2G26040
	AtPYL3	AT1G73000
	AtPYL4	AT2G38310
	AtPYL5	AT5G05440
	AtPYL6	AT2G40330
	AtPYL7	AT4G01026
	AtPYL8	AT5G53160.
	AtPYL9	AT1G01360
	AtPYR1	AT4G17870
Lycium barbarum	LbPYL1	XM_060355288.1
	LbPYL2	XM_060315403.1
	LbPYL3	XM_060316745.1
	LbPYL4	XM_060357010.1
	LbPYL5	XM_060322965.1
	LbPYL6	XM_060317057.1
	LbPYL7	XM_060347829.1
	LbPYL8	XM_060350890.1
	LbPYL9	XM_060362463.1
	LbPYL10	XM_060346502.1
	LbPYL11	XM_060320401.1
	LbPYL12	XM_060337877.1
Populus trichocarpa	PtPYRL1	XM_006368342.2
	PtPYRL10	XM_002320821.4
	PtPYRL11	XM_002321414.4
	PtPYRL12	XM_002304517.4
	PtPYRL13	XM_002318344.4
	PtPYRL14	XM_002297944.4
	PtPYRL2	XM_006385591.3
	PtPYRL3	XM_002324726.4
	PtPYRL4	XM_002308532.4
	PtPYRL5	XM_002315100.4
	PtPYRL6	XM_002308200.4
	PtPYRL7	XM_002312147.4
	PtPYRL8	XM_002322988.4
	PtPYRL9	XM_002302588.4
Solanum lycopersicum	SIPYL1	Sl08g082180
	SlPYL10	Sl03g007310
	SlPYL11	Sl10g076410
	SlPYL12	Sl08g065410
	SlPYL13	Sl02g076770
	SlPYL14	Sl12g095970
	SlPYL2	Sl12g055990
	SlPYL3	Sl01g095700
	SlPYL4	Sl03g095780
	SlPYL5	Sl08g076960
	SlPYL6	Sl06g050500
	SlPYL7	Sl10g085310
	SlPYL8	Sl06g061180
	SlPYL9	Sl09g015380
Zea mays	ZmPYL1	KJ855097.1
	ZmPYL10	KP708579.1
	ZmPYL11	KJ855106.1
	ZmPYL12	KJ855107.1
	ZmPYL13	KJ855108.1
	ZmPYL2	KJ855098.1
	ZmPYL3	Zm00001d016294
	ZmPYL4	KJ855099.1
	ZmPYL5	KJ855100.1
	ZmPYL6	Zm00001d043014
	ZmPYL7	Zm00001d028793
	ZmPYL8	KJ855103.1
	ZmPYL9	KJ855104.1
