# Supplementary material for: Genome-Wide Identification of PYL/RCAR ABA Receptors and Functional Analysis of LbPYL10 in Heat Tolerance in Goji (Lycium barbarum)
Source: Plants (Basel). 2024 Mar 20;13(6):887. doi: 10.3390/plants13060887 (PMC10975129; doi:10.3390/plants13060887)
Supplement: Supplementary file 1 [file plants-13-00887-s001.zip › Table S3. The sequences of motifs and cis-acting elements.xlsx]

## Sheet: Sheet1
Table S3. The sequences of motifs
Motif Name	Sequence
Motif-1	GSLREVRVVSGLPATTSTERLEJLDDERHILSFSVVGGDHRLRNYRSVTT
Motif-2	YHTHEVGPNQCSSALVQRISAPVDLVWSLVRRFDNPQAYKHFIKSCHVIG
Motif-3	DGKPGTIVVESYVVDVPZGNTKEETCVFVDTIVRCNLQSLAQVAENLA
Motif-4	MPSSLQLQRINPNTTTTT
Motif-5	MEDEYIRR
Motif-6	PQGLKKEEFIELEPLIR
Motif-7	VQGHTEPIDR
Motif-8	NFHKQP
Motif-9	QPTWINP
Motif-10	PIPCTAQVP
Motif-11	MNGDGQ
Motif-12	VHPEVI
Motif-13	NPKEKMI
Motif-14	WSCLNQ
Motif-15	VNEFEK
