# Supplementary material for: Genome-Wide Identification of PYL/RCAR ABA Receptors and Functional Analysis of LbPYL10 in Heat Tolerance in Goji (Lycium barbarum)
Source: Plants (Basel). 2024 Mar 20;13(6):887. doi: 10.3390/plants13060887 (PMC10975129; doi:10.3390/plants13060887)
Supplement: Supplementary file 1 [file plants-13-00887-s001.zip › Table S4. The sequences of cis-acting element.xlsx]

## Sheet: Sheet1
Table S4. The sequences of cis-acting element
Cis-acting element Name	Sequence
AT-TATA-box	TATATA/TATATAAA
TATA-box	TATA(A/T)A(A/T)
CAAT-box	CAAAT/CAAT/CCAAT/CCCAATTT/TGCAAATCT/TGCCAAC
ABRE	AACCCGG/ACGTG/CACGTG/CGCACGTGTC/GACACGTGGC/GCCGCGTGGC/TACGTGTC
ABRE3a	TACGTG
ABRE4	CACGTA
ARE	AAACCA
ERE	ATTTTAAA/ATTTCATA
DRE core	GCCGAC
G-box	CACGTT/CACGTG/CACGTC/CACGAC/ACACGTG(G/t)CACC/ACACGTGGC/TACGTG/tgACACGTGGCA/TAACACGTAG/TAAACGTG/GCCACGTGGA/CAGACGTGGCA
MYB	TAACTG/TAACCA/CAACAG/CAACCA/CAACTG
MYB recognition site	CCGTTG
MYB-binding site	CAACAG
MYB-like sequence	TAACCA
MYC	TCTCTTA/CAATTG/CATTTG/CATGTG
AAGAA-motif	gGTAAAGAAA/GAAAGAA
