# Supplementary figures and images for: Genome-Wide Identification of PYL/RCAR ABA Receptors and Functional Analysis of LbPYL10 in Heat Tolerance in Goji (Lycium barbarum)
Source: MDPI journal article supplement (doi:10.3390/plants13060887), 2024-03-20

Figure S2. Conserved domain in PAO and SGRL proteins

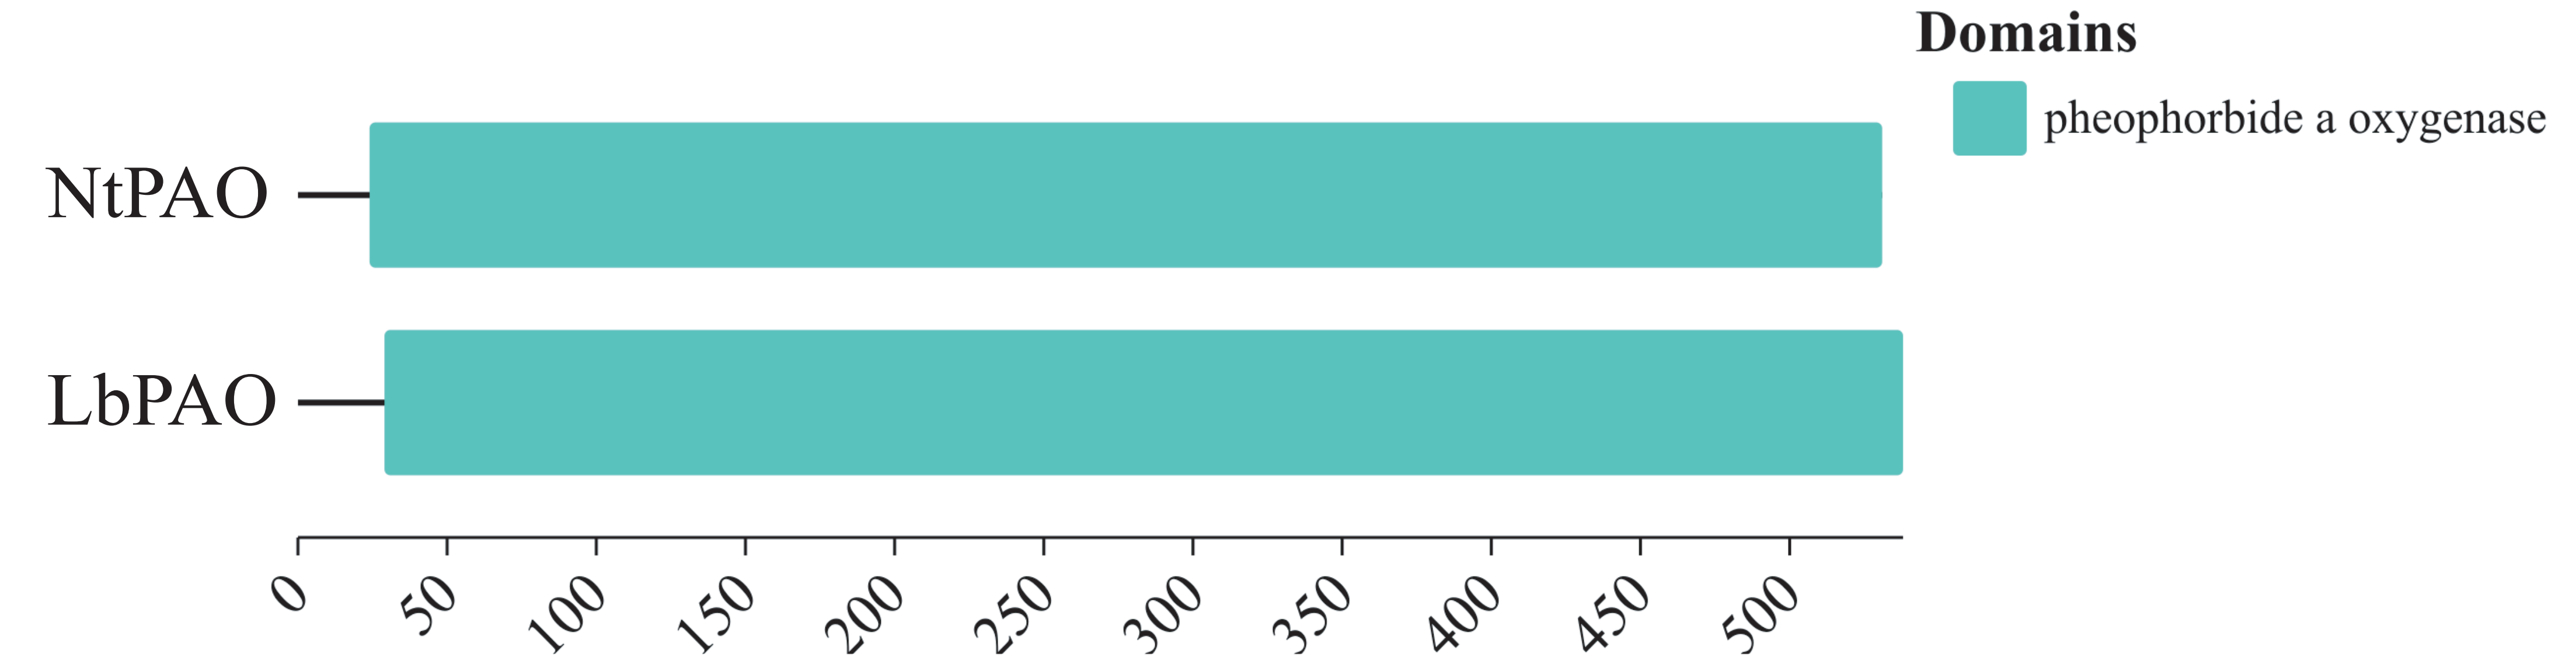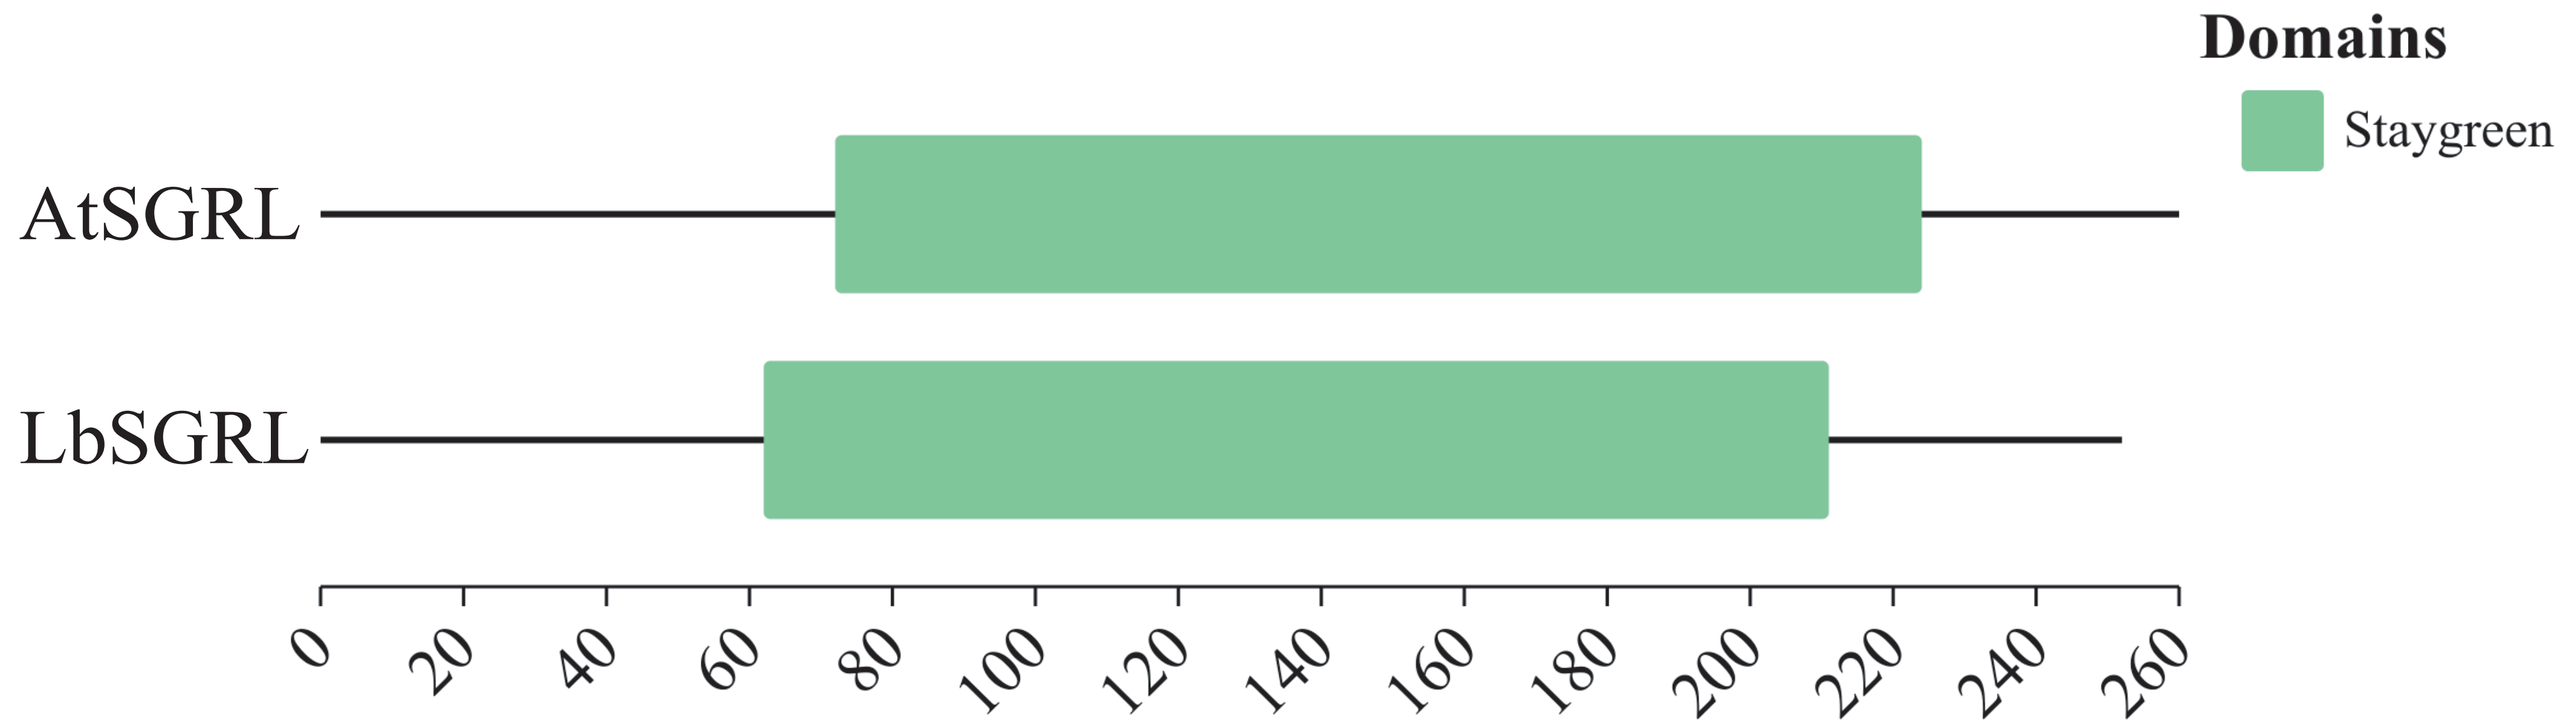

Supplement: s1 [file s1]

Figure S1. Conserved motifs in PAO and SGRL proteins

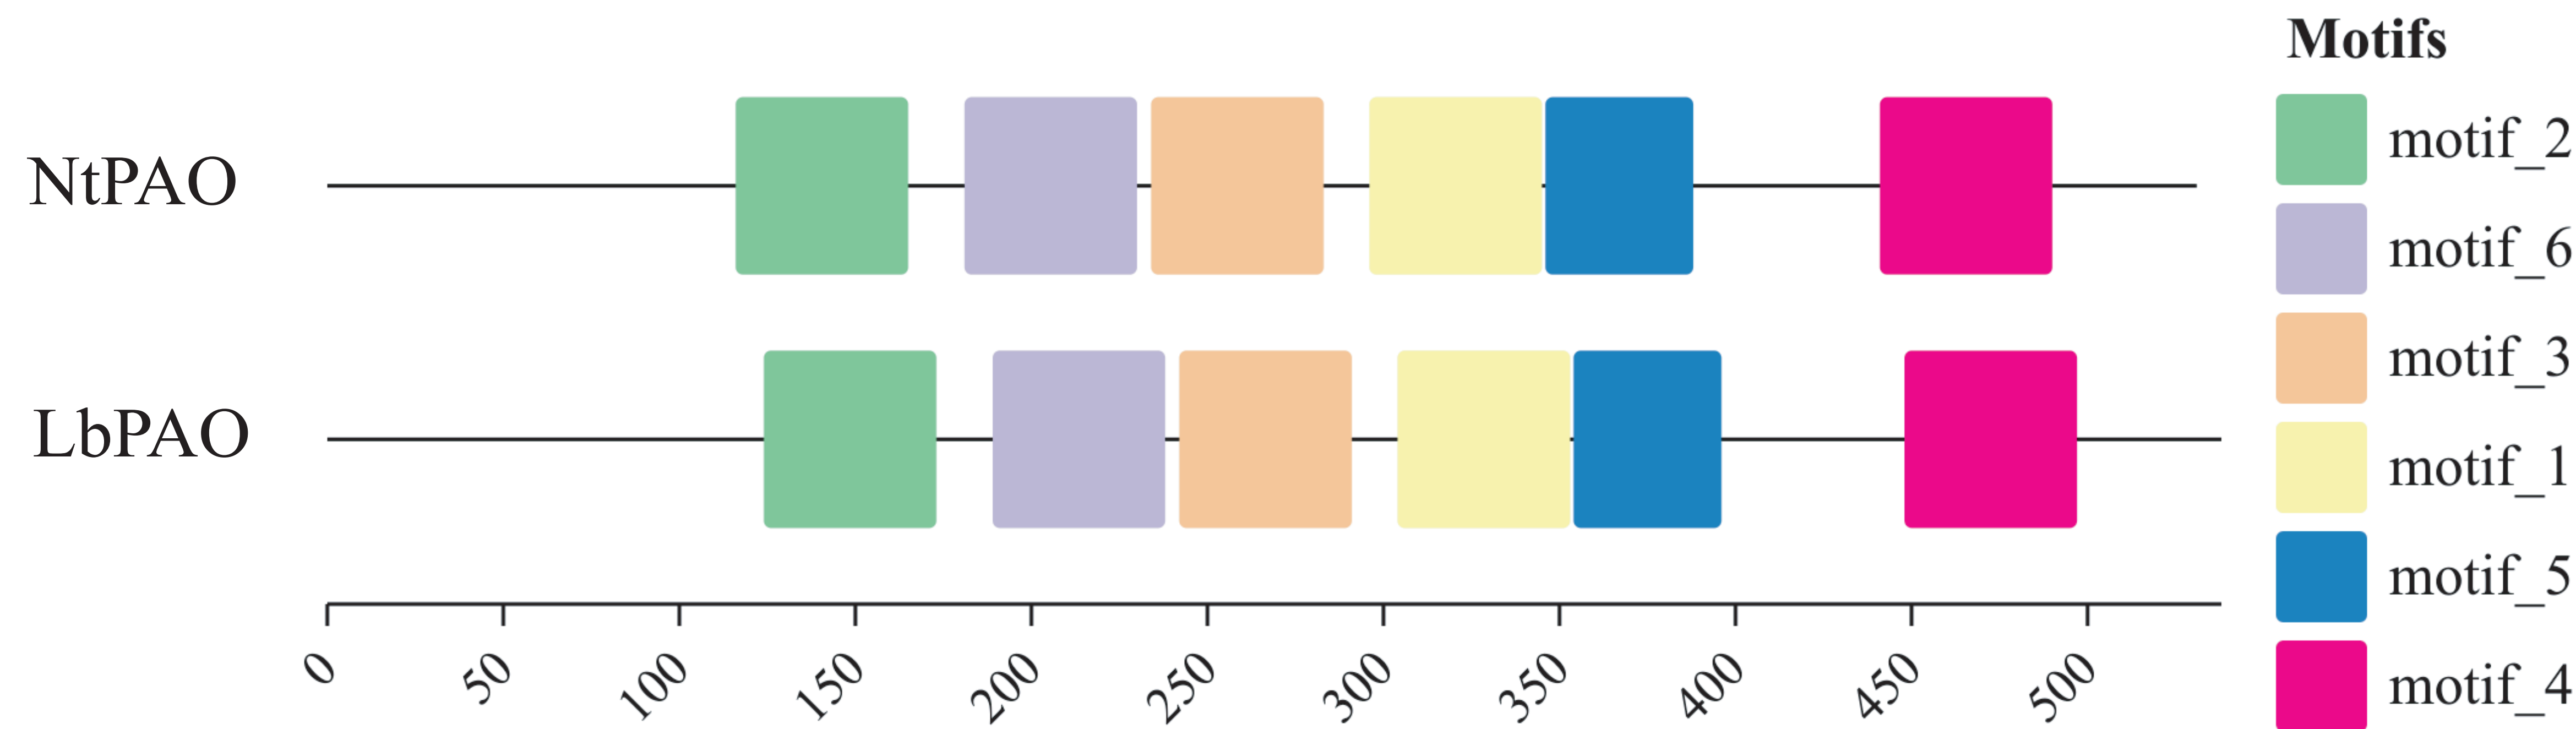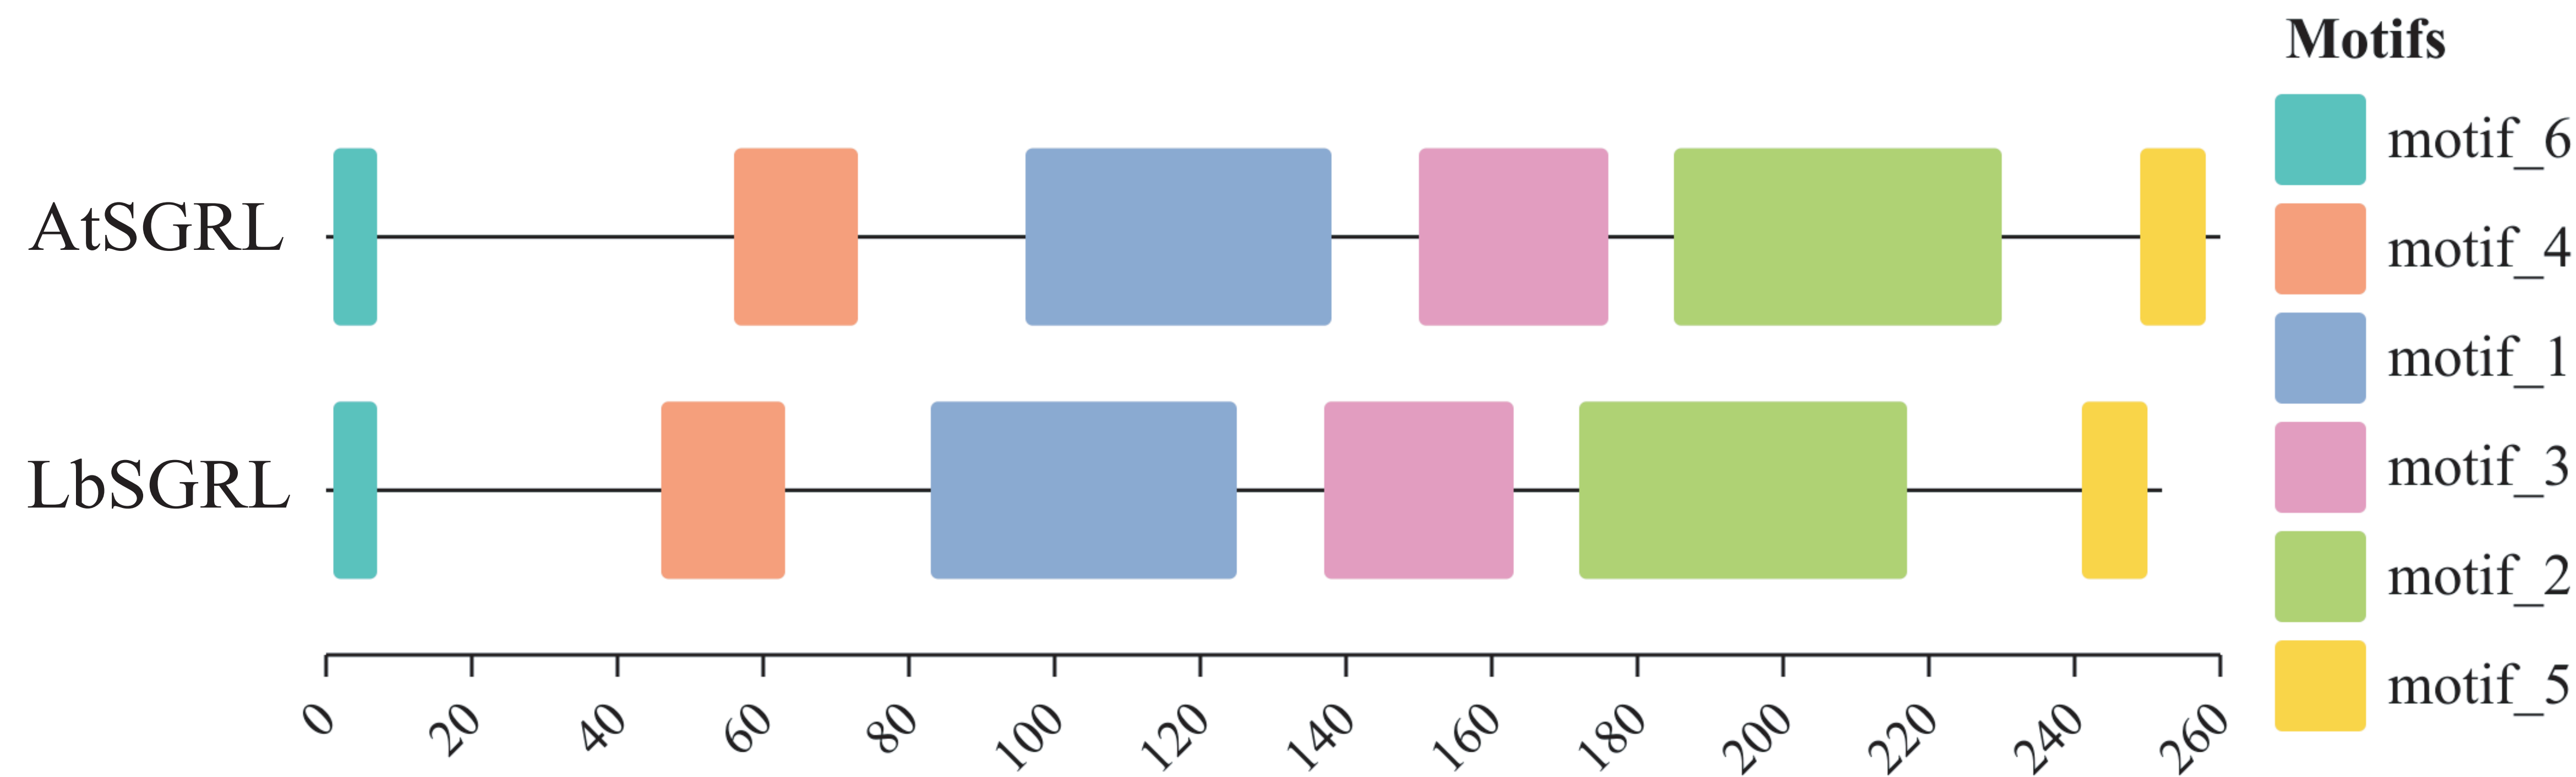

Supplement: s1 [file s1]
